# Supplementary material for: Cartilage intermediate layer protein 1 (CILP1): A novel mediator of cardiac extracellular matrix remodelling
Source: PubMed Central journal article supplement (PMC5700204; doi:10.1038/s41598-017-16201-y), 2017-11-22

## **Supplemental data**

### **Cartilage intermediate layer protein 1 (CILP1):**

#### **A novel mediator of cardiac extracellular matrix remodelling**

Frans A. van Nieuwenhoven<sup>1\*</sup>, Chantal Munts<sup>1</sup>, Roel C. op 't Veld<sup>1</sup>, Arantxa González<sup>2</sup>, Javier Díez<sup>2</sup>, Stephane Heymans<sup>3</sup>, Blanche Schroen<sup>3</sup> and Marc van Bilsen<sup>1</sup>

Departments of <sup>1</sup>Physiology and <sup>3</sup>Cardiology, Cardiovascular Research Institute Maastricht (CARIM), Maastricht University, Maastricht, the Netherlands.

<sup>2</sup>Program of Cardiovascular Diseases, University of Navarra, Pamplona, Spain.

Supplemental Table 1. Baseline characteristics of study participants

| Characteristics              | CABG<br>(n=6) | AoS<br>(EF > 55%; n=6) | AoS<br>(EF < 55%; n=5) |
|------------------------------|---------------|------------------------|------------------------|
| Age (y)                      | 66.7 ± 3      | 68.5 ± 3               | 71 ± 2                 |
| Men/women (n)                | 4/2           | 3/3                    | 5/0                    |
| LV EDD (mm)                  | 47.2 ± 2      | 46.2 ± 2               | 58.8 ± 4* #            |
| LV WT (mm)                   | 8.9 ± 0.5     | 12.5 ± 1**             | 9.7 ± 0.4              |
| EF (%)                       | 59.7 ± 2      | 64.0 ± 2               | 45.6 ± 3** ###         |
| CILP1 (mean array intensity) | 329 ± 109     | 427 ± 73               | 518 ± 65               |

Data are shown as average ± SEM

CABG, Coronary Artery Bypass Graft; AoS, Aortic stenosis; LV EDD, left ventricular end-diastolic diameter; LV WT, left ventricular wall thickness; EF, ejection fraction

\*p <0.05; \*\*p <0.01 vs CABG

#p <0.05; ###p <0.001 vs AoS EF >55%

Supplemental Table 2. Gene-specific primer sequences used for quantitative real-time PCR

| Gene                                               | Species       | Forward primer         | Reverse primer            |
|----------------------------------------------------|---------------|------------------------|---------------------------|
| alpha-Smooth muscle actin (ACTA2)                  | rat           | AAGGCCAACCGGGAGAAAAT   | AGTCCAGCACAAATACCAGTTGT   |
| Cartilage intermediate-layer protein 1 (CILP1)     | mouse         | ACAGGGAGCAGAGACCAG     | GACCAGGAACTCCAGATGTG      |
| Cartilage intermediate-layer protein 1 (CILP1)     | rat           | GAGTACTTCTGTAAGGCGCAG  | GGCATTCTGGAAGCAATCATG     |
| Cartilage intermediate-layer protein 1 (CILP1)     | human         | AATTACACCGTACGCTTCCTC  | CATCTCTGCCAAGCAAATGC      |
| Collagen, type 1, alpha 1 (Col1A1)                 | mouse         | CGAAGGCAACAGTCGCTTCA   | GGTCTTGGTGGTTTTGTATTGAT   |
| Collagen, type 1, alpha 1 (Col1A1)                 | rat           | CGAAGGCAACAGTCGATTCA   | GGTCTTGGTGGTTTTGTATTGAT   |
| Collagen, type 1, alpha 1 (Col1A1)                 | human         | AGGACAAGAGGCATGTCTGGTT | GGACATCAGGCGCAGGAA        |
| Connective tissue growth factor (CTGF)             | mouse / human | CACAGAGTGGAGCGCCTGTTC  | GATGCACTTTTTGCCCTTCTTAATG |
| Cyclophilin-A (Cyclo)                              | mouse / rat   | CAAATGCTGGACCAAACACAA  | TTCACCTTCCCAAAGACCACAT    |
| Cyclophilin-A (Cyclo)                              | human         | CCCACCGTGTTCTTCGACAT   | CCAGTGCTCAGAGCACGAAA      |
| Transforming growth factor, beta 1 (TGF $\beta$ 1) | mouse         | ATCCTGTCCAAACTAAGGCTCG | ACCTCTTTAGCATAGTAGTCCGC   |
| Transforming growth factor, beta 3 (TGF $\beta$ 3) | mouse         | GGACTTCGGCCACATCAAGAA  | TAGGGGACGTGGGTCATCAC      |

Supplemental Table 3. Cilp1 correlation factors

| Number | Array_ID | Entrez_ID | Gene Name | r       | r <sup>2</sup> |
|--------|----------|-----------|-----------|---------|----------------|
| 1      | 1440709  | 8483      | CILP      | 1.0000  | 1.0000         |
| 2      | 4040671  | 1278      | COL1A2    | 0.9096  | 0.8274         |
| 3      | 2360576  | NA        | NA        | -0.8922 | 0.7961         |
| 4      | 2600164  | 7058      | THBS2     | 0.8913  | 0.7944         |
| 5      | 5860152  | 960       | CD44      | 0.8911  | 0.7941         |
| 6      | 6330504  | 56256     | SERTAD4   | 0.8877  | 0.7879         |
| 7      | 4180301  | 22891     | ZNF365    | 0.8821  | 0.7781         |
| 8      | 4290431  | 1809      | DPYSL3    | 0.8801  | 0.7746         |
| 9      | 240400   | 56937     | PMEPA1    | 0.8794  | 0.7734         |
| 10     | 4200674  | 3485      | IGFBP2    | 0.8784  | 0.7717         |
| 11     | 5290132  | 80781     | COL18A1   | 0.8741  | 0.7640         |
| 12     | 7650672  | 23452     | ANGPTL2   | 0.8699  | 0.7567         |
| 13     | 4560328  | 6624      | FSCN1     | 0.8687  | 0.7547         |
| 14     | 5090626  | 2191      | FAP       | 0.8665  | 0.7508         |
| 15     | 4290292  | NA        | NA        | -0.8658 | 0.7496         |
| 16     | 1430278  | 1513      | CTSK      | 0.8656  | 0.7492         |
| 17     | 460767   | 633       | BGN       | 0.8638  | 0.7461         |
| 18     | 1030008  | 7043      | TGFB3     | 0.8637  | 0.7459         |
| 19     | 2360551  | 220       | ALDH1A3   | 0.8637  | 0.7459         |
| 20     | 1110048  | 11341     | SCRG1     | 0.8630  | 0.7448         |
| 21     | 5960021  | 5305      | PIP4K2A   | 0.8620  | 0.7431         |
| 22     | 4570398  | NA        | NA        | 0.8609  | 0.7411         |
| 23     | 6590341  | 11031     | RAB31     | 0.8563  | 0.7332         |
| 24     | 5870424  | 57616     | TSHZ3     | 0.8559  | 0.7325         |
| 25     | 1230039  | 9068      | ANGPTL1   | 0.8548  | 0.7307         |
| 26     | 6900053  | 8495      | PPFIBP2   | 0.8534  | 0.7284         |
| 27     | 940735   | 4256      | MGP       | 0.8533  | 0.7281         |
| 28     | 6760593  | 114884    | OSBPL10   | 0.8527  | 0.7271         |
| 29     | 7400368  | 861       | RUNX1     | 0.8506  | 0.7236         |
| 30     | 3130615  | 10016     | PDCD6     | 0.8485  | 0.7200         |
| 31     | 5080192  | 5270      | SERPINE2  | 0.8469  | 0.7172         |
| 32     | 2120021  | 1281      | COL3A1    | 0.8466  | 0.7168         |
| 33     | 1070114  | 26508     | HEYL      | 0.8443  | 0.7129         |

Supplemental data, van Nieuwenhoven et al. CILP1 in cardiac ECM remodelling

|    |         |        |          |         |        |
|----|---------|--------|----------|---------|--------|
| 34 | 1470669 | 3371   | TNC      | 0.8428  | 0.7103 |
| 35 | 2470114 | 1293   | COL6A3   | 0.8401  | 0.7058 |
| 36 | 4810575 | 9719   | ADAMTSL2 | 0.8380  | 0.7022 |
| 37 | 630601  | 4735   | SEPT2    | 0.8363  | 0.6994 |
| 38 | 6290356 | 5176   | SERPINF1 | 0.8356  | 0.6982 |
| 39 | 2470079 | 7756   | ZNF207   | 0.8327  | 0.6934 |
| 40 | 3940435 | 2012   | EMP1     | 0.8295  | 0.6881 |
| 41 | 4900520 | 7857   | SCG2     | 0.8258  | 0.6820 |
| 42 | 3370162 | 10418  | SPON1    | 0.8255  | 0.6814 |
| 43 | 1770685 | 4628   | MYH10    | 0.8237  | 0.6785 |
| 44 | 1400044 | 259217 | HSPA12A  | -0.8190 | 0.6708 |
| 45 | 5720180 | 2535   | FZD2     | 0.8190  | 0.6707 |
| 46 | 6770309 | 4637   | MYL6     | 0.8189  | 0.6706 |
| 47 | 4220239 | NA     | NA       | 0.8179  | 0.6690 |
| 48 | 6980669 | 219438 | OR5D18   | -0.8170 | 0.6674 |
| 49 | 6330008 | NA     | NA       | 0.8166  | 0.6669 |
| 50 | 4640743 | 1266   | CNN3     | 0.8164  | 0.6665 |
| 51 | 610164  | 2534   | FYN      | 0.8164  | 0.6664 |
| 52 | 6580711 | 165    | AEBP1    | 0.8143  | 0.6631 |
| 53 | 2100274 | 54843  | SYTL2    | 0.8131  | 0.6611 |
| 54 | 830376  | NA     | NA       | 0.8121  | 0.6595 |
| 55 | 4120386 | 5118   | PCOLCE   | 0.8109  | 0.6575 |
| 56 | 2760181 | 51805  | COQ3     | -0.8101 | 0.6563 |
| 57 | 6180554 | 79987  | SVEP1    | 0.8078  | 0.6526 |
| 58 | 3830762 | 338773 | TMEM119  | 0.8065  | 0.6505 |
| 59 | 5720327 | 5684   | PSMA3    | -0.8063 | 0.6502 |
| 60 | 4490292 | 1290   | COL5A2   | 0.8062  | 0.6499 |
| 61 | 6220019 | 5179   | PENK     | 0.8050  | 0.6481 |
| 62 | 2510091 | 1295   | COL8A1   | 0.8047  | 0.6476 |
| 63 | 6420025 | 55107  | ANO1     | 0.8035  | 0.6457 |
| 64 | 3440386 | 1893   | ECM1     | 0.8035  | 0.6456 |
| 65 | 5720438 | 493869 | GPX8     | 0.8022  | 0.6435 |
| 66 | 6840639 | 255631 | COL24A1  | 0.7966  | 0.6346 |
| 67 | 5490431 | 6303   | SAT1     | 0.7950  | 0.6320 |
| 68 | 4920202 | 4130   | MAP1A    | 0.7948  | 0.6317 |
| 69 | 6040750 | NA     | NA       | -0.7938 | 0.6301 |

## Supplemental data, van Nieuwenhoven et al. CILP1 in cardiac ECM remodelling

|     |         |        |          |         |        |
|-----|---------|--------|----------|---------|--------|
| 70  | 1510646 | 8277   | TKTL1    | -0.7922 | 0.6276 |
| 71  | 5570139 | 25797  | QPCT     | 0.7919  | 0.6271 |
| 72  | 2510392 | 79188  | TMEM43   | 0.7913  | 0.6261 |
| 73  | 2340131 | NA     | NA       | -0.7913 | 0.6261 |
| 74  | 4830575 | 151887 | CCDC80   | 0.7910  | 0.6257 |
| 75  | 5820646 | 10241  | CALCOCO2 | -0.7910 | 0.6257 |
| 76  | 3890138 | 10903  | MTMR11   | 0.7905  | 0.6248 |
| 77  | 50128   | 199857 | ALG14    | 0.7897  | 0.6236 |
| 78  | 3780438 | NA     | NA       | 0.7894  | 0.6232 |
| 79  | 3190021 | 59277  | NTN4     | 0.7894  | 0.6232 |
| 80  | 1980671 | 55188  | RIC8B    | -0.7891 | 0.6227 |
| 81  | 4220440 | 10788  | IQGAP2   | 0.7889  | 0.6223 |
| 82  | 2190377 | 8666   | EIF3G    | -0.7888 | 0.6222 |
| 83  | 70167   | 23643  | LY96     | 0.7883  | 0.6214 |
| 84  | 2650112 | 6567   | SLC16A2  | 0.7878  | 0.6207 |
| 85  | 6420731 | 6574   | SLC20A1  | 0.7873  | 0.6199 |
| 86  | 6200253 | NA     | NA       | 0.7870  | 0.6194 |
| 87  | 3610102 | 2307   | FOXS1    | 0.7864  | 0.6185 |
| 88  | 2970445 | NA     | NA       | 0.7864  | 0.6184 |
| 89  | 270706  | 1287   | COL4A5   | 0.7855  | 0.6171 |
| 90  | 3850131 | 10971  | YWHAQ    | 0.7852  | 0.6166 |
| 91  | 4590441 | 1727   | CYB5R3   | 0.7852  | 0.6165 |
| 92  | 6980129 | 221476 | PI16     | 0.7839  | 0.6145 |
| 93  | 3940440 | 11214  | AKAP13   | 0.7838  | 0.6143 |
| 94  | 2970730 | 91663  | MYADM    | 0.7836  | 0.6141 |
| 95  | 70196   | 1296   | COL8A2   | 0.7823  | 0.6120 |
| 96  | 1470296 | 3908   | LAMA2    | 0.7806  | 0.6094 |
| 97  | 7150563 | NA     | NA       | 0.7805  | 0.6091 |
| 98  | 4040544 | 2042   | EPHA3    | 0.7797  | 0.6080 |
| 99  | 2140228 | 1039   | CDR2     | 0.7794  | 0.6075 |
| 100 | 3780228 | 7188   | TRAF5    | 0.7790  | 0.6069 |
| 101 | 4670544 | 55902  | ACSS2    | -0.7753 | 0.6011 |
| 102 | 6620008 | 3730   | ANOS1    | 0.7749  | 0.6005 |
| 103 | 5690463 | 79703  | C11orf80 | 0.7745  | 0.5999 |
| 104 | 5960725 | 2887   | GRB10    | 0.7743  | 0.5995 |
| 105 | 2710114 | 2782   | GNB1     | 0.7739  | 0.5989 |

## Supplemental data, van Nieuwenhoven et al. CILP1 in cardiac ECM remodelling

|     |         |        |           |         |        |
|-----|---------|--------|-----------|---------|--------|
| 106 | 1510458 | 4627   | MYH9      | 0.7734  | 0.5981 |
| 107 | 1690487 | 285382 | C3orf70   | 0.7727  | 0.5971 |
| 108 | 830278  | 152007 | GLIPR2    | 0.7719  | 0.5958 |
| 109 | 450253  | 5747   | PTK2      | 0.7713  | 0.5950 |
| 110 | 610452  | 3688   | ITGB1     | 0.7688  | 0.5911 |
| 111 | 5260561 | 7216   | TRO       | 0.7685  | 0.5907 |
| 112 | 3310424 | 71     | ACTG1     | 0.7672  | 0.5886 |
| 113 | 5910113 | 1462   | VCAN      | 0.7658  | 0.5864 |
| 114 | 4860546 | 115908 | CTHRC1    | 0.7658  | 0.5864 |
| 115 | 1660598 | 65267  | WNK3      | 0.7653  | 0.5856 |
| 116 | 6760475 | 1284   | COL4A2    | 0.7642  | 0.5840 |
| 117 | 2230161 | 57142  | RTN4      | 0.7638  | 0.5834 |
| 118 | 540075  | 10577  | NPC2      | 0.7632  | 0.5825 |
| 119 | 6450291 | 7044   | LEFTY2    | 0.7627  | 0.5817 |
| 120 | 6650189 | 5830   | PEX5      | -0.7626 | 0.5815 |
| 121 | 2260241 | NA     | NA        | -0.7619 | 0.5805 |
| 122 | 5420754 | NA     | NA        | 0.7618  | 0.5804 |
| 123 | 5820278 | 644378 | NA        | -0.7613 | 0.5796 |
| 124 | 7380279 | 79709  | COLGALT1  | 0.7603  | 0.5781 |
| 125 | 940474  | 27286  | SRPX2     | 0.7590  | 0.5761 |
| 126 | 6100482 | 493    | ATP2B4    | 0.7585  | 0.5752 |
| 127 | 4760427 | 23287  | AGTPBP1   | -0.7560 | 0.5715 |
| 128 | 4250689 | NA     | NA        | -0.7555 | 0.5708 |
| 129 | 5290246 | 9213   | XPR1      | 0.7551  | 0.5701 |
| 130 | 3140603 | 6840   | SVIL      | 0.7548  | 0.5697 |
| 131 | 6760661 | 726    | CAPN5     | 0.7523  | 0.5659 |
| 132 | 2140121 | 10409  | BASP1     | 0.7523  | 0.5659 |
| 133 | 2140242 | 7130   | TNFAIP6   | 0.7522  | 0.5658 |
| 134 | 6980739 | 25890  | ABI3BP    | 0.7516  | 0.5649 |
| 135 | 6350367 | 10647  | SCGB1D2   | -0.7514 | 0.5646 |
| 136 | 4010215 | 337979 | KRTAP22-1 | 0.7511  | 0.5642 |
| 137 | 7050220 | 10874  | NMU       | -0.7511 | 0.5641 |
| 138 | 2630437 | 64094  | SMOC2     | 0.7508  | 0.5637 |
| 139 | 20647   | 84168  | ANTXR1    | 0.7502  | 0.5629 |
| 140 | 20288   | 55752  | SEPT11    | 0.7500  | 0.5625 |
| 141 | 2190326 | 1734   | DIO2      | 0.7498  | 0.5621 |

Supplemental data, van Nieuwenhoven et al. CILP1 in cardiac ECM remodelling

|     |         |           |          |         |        |
|-----|---------|-----------|----------|---------|--------|
| 142 | 1090128 | NA        | NA       | 0.7495  | 0.5617 |
| 143 | 150551  | NA        | NA       | 0.7493  | 0.5615 |
| 144 | 6480703 | 558       | AXL      | 0.7485  | 0.5603 |
| 145 | 3170072 | 23020     | SNRNP200 | 0.7482  | 0.5598 |
| 146 | 1710408 | NA        | NA       | 0.7481  | 0.5596 |
| 147 | 5900286 | 146198    | ZFP90    | 0.7479  | 0.5594 |
| 148 | 3830402 | NA        | NA       | 0.7474  | 0.5587 |
| 149 | 1170647 | 37        | ACADVL   | -0.7473 | 0.5585 |
| 150 | 270128  | NA        | NA       | -0.7465 | 0.5573 |
| 151 | 6550600 | 4609      | MYC      | 0.7463  | 0.5570 |
| 152 | 6020719 | 51715     | RAB23    | 0.7462  | 0.5569 |
| 153 | 4610390 | 60        | ACTB     | 0.7461  | 0.5567 |
| 154 | 4730133 | NA        | NA       | 0.7455  | 0.5557 |
| 155 | 150328  | NA        | NA       | 0.7452  | 0.5553 |
| 156 | 7380180 | 79865     | TREML2   | -0.7450 | 0.5550 |
| 157 | 6650327 | 1047      | CLGN     | -0.7447 | 0.5546 |
| 158 | 7610730 | 139818    | DOCK11   | 0.7442  | 0.5538 |
| 159 | 4640053 | NA        | NA       | -0.7438 | 0.5533 |
| 160 | 2940450 | NA        | NA       | -0.7436 | 0.5529 |
| 161 | 2320026 | NA        | NA       | 0.7434  | 0.5527 |
| 162 | 1300280 | 7852      | CXCR4    | 0.7431  | 0.5522 |
| 163 | 4780615 | 302       | ANXA2    | 0.7430  | 0.5521 |
| 164 | 4480152 | 4969      | OGN      | 0.7430  | 0.5521 |
| 165 | 770463  | 27295     | PDLIM3   | 0.7426  | 0.5515 |
| 166 | 3870136 | 8815      | BANF1    | 0.7419  | 0.5504 |
| 167 | 450398  | 9371      | KIF3B    | 0.7406  | 0.5484 |
| 168 | 2470730 | NA        | NA       | 0.7398  | 0.5473 |
| 169 | 3440519 | 400120    | SERTM1   | -0.7397 | 0.5471 |
| 170 | 770564  | 79762     | C1orf115 | -0.7389 | 0.5460 |
| 171 | 4210309 | 50999     | TMED5    | -0.7388 | 0.5459 |
| 172 | 830593  | 7431      | VIM      | 0.7387  | 0.5456 |
| 173 | 630377  | 387       | RHOA     | 0.7381  | 0.5449 |
| 174 | 1470020 | 9567      | GTPBP1   | 0.7381  | 0.5447 |
| 175 | 3390647 | NA        | NA       | -0.7380 | 0.5446 |
| 176 | 5290408 | 84693     | MCEE     | -0.7377 | 0.5442 |
| 177 | 5700681 | 100131735 | NA       | -0.7375 | 0.5440 |



Supplemental data, van Nieuwenhoven et al. CILP1 in cardiac ECM remodelling

|     |         |        |           |         |        |
|-----|---------|--------|-----------|---------|--------|
| 178 | 2750372 | NA     | NA        | 0.7371  | 0.5433 |
| 179 | 4220441 | 5789   | PTPRD     | 0.7366  | 0.5426 |
| 180 | 4540021 | 506    | ATP5B     | -0.7365 | 0.5424 |
| 181 | 2970600 | NA     | NA        | -0.7363 | 0.5421 |
| 182 | 3420519 | NA     | NA        | -0.7359 | 0.5416 |
| 183 | 1850193 | 81689  | ISCA1     | -0.7357 | 0.5412 |
| 184 | 290373  | 85363  | TRIM5     | -0.7356 | 0.5412 |
| 185 | 6400148 | 140606 |           | 0.7356  | 0.5412 |
| 186 | 5360243 | 3693   | ITGB5     | 0.7342  | 0.5391 |
| 187 | 4880537 | 51474  | LIMA1     | 0.7339  | 0.5386 |
| 188 | 1690044 | 11238  | CA5B      | 0.7337  | 0.5382 |
| 189 | 110307  | 11259  | FILIP1L   | 0.7333  | 0.5377 |
| 190 | 1440440 | 7867   | MAPKAPK3  | -0.7332 | 0.5376 |
| 191 | 3460278 | 83606  | GUCD1     | -0.7328 | 0.5370 |
| 192 | 2680767 | 64951  | MRPS24    | -0.7328 | 0.5370 |
| 193 | 1030519 | 4601   | MXI1      | -0.7325 | 0.5365 |
| 194 | 4480593 | 2200   | FBN1      | 0.7323  | 0.5363 |
| 195 | 610095  | 1995   | ELAVL3    | -0.7322 | 0.5361 |
| 196 | 620440  | NA     | NA        | -0.7321 | 0.5360 |
| 197 | 4260593 | 26088  | GGA1      | 0.7320  | 0.5359 |
| 198 | 3170504 | 89781  | HPS4      | 0.7318  | 0.5355 |
| 199 | 5490593 | 622    | BDH1      | -0.7317 | 0.5354 |
| 200 | 870328  | 51295  | ECSIT     | -0.7317 | 0.5354 |
| 201 | 4900193 | 84186  | ZCCHC7    | 0.7315  | 0.5350 |
| 202 | 3290551 | 8672   | EIF4G3    | 0.7309  | 0.5342 |
| 203 | 2600431 | 29015  | SLC43A3   | 0.7303  | 0.5334 |
| 204 | 2650220 | 11167  | FSTL1     | 0.7302  | 0.5332 |
| 205 | 6520066 | 6845   | VAMP7     | 0.7300  | 0.5329 |
| 206 | 1570370 | 84681  | HINT2     | -0.7300 | 0.5329 |
| 207 | 5550768 | NA     | NA        | 0.7294  | 0.5320 |
| 208 | 2650753 | 222223 | KIAA1324L | 0.7293  | 0.5318 |
| 209 | 3290398 | 5250   | SLC25A3   | -0.7292 | 0.5317 |
| 210 | 460600  | NA     | NA        | 0.7285  | 0.5307 |
| 211 | 1240243 | 25923  | ATL3      | 0.7279  | 0.5298 |
| 212 | 1980632 | 3301   | DNAJA1    | 0.7278  | 0.5296 |
| 213 | 830369  | 92912  | UBE2Q2    | 0.7275  | 0.5293 |

Supplemental data, van Nieuwenhoven et al. CILP1 in cardiac ECM remodelling

|     |         |        |           |         |        |
|-----|---------|--------|-----------|---------|--------|
| 214 | 160348  | 7278   | TUBA3C    | -0.7275 | 0.5292 |
| 215 | 4220767 | 4092   | SMAD7     | 0.7269  | 0.5284 |
| 216 | 2640543 | 6424   | SFRP4     | 0.7267  | 0.5282 |
| 217 | 1260040 | 2202   | EFEMP1    | 0.7264  | 0.5276 |
| 218 | 7380619 | 3835   | KIF22     | -0.7259 | 0.5269 |
| 219 | 650328  | 7293   | TNFRSF4   | 0.7258  | 0.5267 |
| 220 | 4220041 | 6558   | SLC12A2   | 0.7251  | 0.5258 |
| 221 | 6330593 | 5745   | PTH1R     | -0.7250 | 0.5256 |
| 222 | 5560180 | 22872  | SEC31A    | 0.7240  | 0.5242 |
| 223 | 240494  | 6932   | TCF7      | -0.7238 | 0.5238 |
| 224 | 6130682 | 2875   | GPT       | -0.7231 | 0.5229 |
| 225 | 4670059 | 51776  |           | 0.7230  | 0.5228 |
| 226 | 3800215 | 9721   | GPRIN2    | 0.7230  | 0.5227 |
| 227 | 6770403 | NA     | NA        | -0.7229 | 0.5225 |
| 228 | 7150475 | 9948   | WDR1      | 0.7228  | 0.5224 |
| 229 | 4060279 | 10758  | TRAF3IP2  | 0.7225  | 0.5220 |
| 230 | 6110195 | 219654 | ZCCHC24   | 0.7224  | 0.5219 |
| 231 | 2940075 | 55437  | STRADB    | -0.7223 | 0.5218 |
| 232 | 3190689 | 64062  | RBM26     | 0.7218  | 0.5209 |
| 233 | 2030553 | NA     | NA        | 0.7216  | 0.5208 |
| 234 | 1440707 | 10513  | APPBP2    | 0.7204  | 0.5190 |
| 235 | 5360743 | 1307   | COL16A1   | 0.7204  | 0.5189 |
| 236 | 4220064 | 2821   | GPI       | -0.7200 | 0.5184 |
| 237 | 6960142 | 1277   | COL1A1    | 0.7196  | 0.5179 |
| 238 | 4230520 | 8655   | DYNLL1    | 0.7195  | 0.5177 |
| 239 | 6350392 | 6509   | SLC1A4    | 0.7193  | 0.5174 |
| 240 | 7380450 | NA     | NA        | 0.7189  | 0.5168 |
| 241 | 3400538 | 3490   | IGFBP7    | 0.7185  | 0.5162 |
| 242 | 3120520 | 11345  | GABARAPL2 | 0.7182  | 0.5158 |
| 243 | 1570075 | 26272  | FBXO4     | 0.7181  | 0.5156 |
| 244 | 50300   | NA     | NA        | -0.7180 | 0.5155 |
| 245 | 6020315 | NA     | NA        | -0.7179 | 0.5154 |
| 246 | 7510349 | NA     | NA        | 0.7173  | 0.5146 |
| 247 | 4290390 | 7412   | VCAM1     | 0.7164  | 0.5132 |
| 248 | 4200259 | 47     | ACLY      | 0.7158  | 0.5123 |
| 249 | 4490017 | 51228  | GLTP      | 0.7156  | 0.5121 |

Supplemental data, van Nieuwenhoven et al. CILP1 in cardiac ECM remodelling

|     |         |        |          |         |        |
|-----|---------|--------|----------|---------|--------|
| 250 | 3800066 | 595135 | PGM5P2   | 0.7156  | 0.5121 |
| 251 | 4220148 | NA     | NA       | -0.7149 | 0.5111 |
| 252 | 5690687 | NA     | NA       | 0.7149  | 0.5111 |
| 253 | 3190400 | 56971  | CEACAM19 | 0.7149  | 0.5111 |
| 254 | 4780050 | 7358   | UGDH     | 0.7147  | 0.5107 |
| 255 | 4070152 | NA     | NA       | -0.7145 | 0.5105 |
| 256 | 1010176 | 81544  | GDPD5    | 0.7142  | 0.5100 |
| 257 | 270458  | 83690  | CRISPLD1 | 0.7141  | 0.5100 |
| 258 | 6940037 | 3357   | HTR2B    | 0.7140  | 0.5098 |
| 259 | 50037   | 157378 | TMEM65   | 0.7135  | 0.5091 |
| 260 | 1980360 | 51150  | SDF4     | 0.7134  | 0.5089 |
| 261 | 3440132 | NA     | NA       | -0.7133 | 0.5088 |
| 262 | 5130750 | 3087   | HHEX     | 0.7132  | 0.5087 |
| 263 | 650678  | 6876   | TAGLN    | 0.7128  | 0.5082 |
| 264 | 290162  | NA     | NA       | 0.7121  | 0.5070 |
| 265 | 6550315 | 57149  | LYRM1    | -0.7120 | 0.5069 |
| 266 | 7050445 | NA     | NA       | 0.7119  | 0.5068 |
| 267 | 6520451 | 7096   | TLR1     | 0.7116  | 0.5063 |
| 268 | 5960528 | 51104  | ABHD17B  | -0.7116 | 0.5063 |
| 269 | 580465  | 22846  | VASH1    | 0.7113  | 0.5060 |
| 270 | 2190475 | 26052  | DNM3     | 0.7104  | 0.5047 |
| 271 | 6770025 | 2197   | FAU      | -0.7104 | 0.5047 |
| 272 | 630327  | 5979   | RET      | -0.7098 | 0.5038 |
| 273 | 2190674 | NA     | NA       | 0.7097  | 0.5037 |
| 274 | 6130577 | 2006   | ELN      | 0.7095  | 0.5034 |
| 275 | 3360064 | 255189 | PLA2G4F  | -0.7093 | 0.5032 |
| 276 | 7550398 | NA     | NA       | -0.7090 | 0.5027 |
| 277 | 4150603 | NA     | NA       | 0.7076  | 0.5007 |
| 278 | 650332  | NA     | NA       | -0.7076 | 0.5007 |
| 279 | 2600519 | 85395  | FAM207A  | -0.7076 | 0.5006 |
| 280 | 5340504 | 9465   | AKAP7    | -0.7075 | 0.5006 |
| 281 | 2360066 | 253935 | ANGPTL5  | 0.7072  | 0.5001 |

---

NA indicates not annotated

Gene names according to HGNC

Supplemental Table 4. Enrichment analysis of genes of which the expression correlated strongly ( $r^2 > 0.5$ ) with CILP1 using the PANTHER Overrepresentation Test (release 20160321). GO Ontology database released 2016-04-23.

| Number | GO number | Biological Proces                                             | Fold Enrichment | P-value  |
|--------|-----------|---------------------------------------------------------------|-----------------|----------|
| 1      | 50849     | negative regulation of calcium-mediated signaling             | 27.21           | 1.19E-02 |
| 2      | 30574     | collagen catabolic process                                    | 16.26           | 3.72E-09 |
| 3      | 30199     | collagen fibril organization                                  | 16.04           | 3.12E-03 |
| 4      | 44243     | multicellular organism catabolic process                      | 14.87           | 1.21E-08 |
| 5      | 32963     | collagen metabolic process                                    | 14.34           | 1.94E-08 |
| 6      | 44259     | multicellular organismal macromolecule metabolic process      | 13.55           | 4.10E-08 |
| 7      | 31032     | actomyosin structure organization                             | 12.9            | 2.41E-06 |
| 8      | 44236     | multicellular organism metabolic process                      | 12.56           | 2.02E-08 |
| 9      | 30239     | myofibril assembly                                            | 11.95           | 2.16E-02 |
| 10     | 22617     | extracellular matrix disassembly                              | 11.33           | 1.71E-08 |
| 11     | 71230     | cellular response to amino acid stimulus                      | 11.29           | 3.12E-02 |
| 12     | 71300     | cellular response to retinoic acid                            | 10.72           | 9.24E-03 |
| 13     | 6635      | fatty acid beta-oxidation                                     | 10.51           | 4.95E-02 |
| 14     | 48013     | ephrin receptor signaling pathway                             | 8.34            | 1.53E-02 |
| 15     | 30198     | extracellular matrix organization                             | 8.15            | 2.28E-17 |
| 16     | 32526     | response to retinoic acid                                     | 8.14            | 5.06E-03 |
| 17     | 43062     | extracellular structure organization                          | 8.13            | 2.48E-17 |
| 18     | 71559     | response to transforming growth factor beta                   | 7.49            | 6.77E-06 |
| 19     | 71560     | cellular response to transforming growth factor beta stimulus | 7.18            | 4.07E-05 |
| 20     | 71229     | cellular response to acid chemical                            | 7.18            | 4.07E-05 |
| 21     | 1649      | osteoblast differentiation                                    | 6.97            | 2.00E-02 |
| 22     | 1503      | ossification                                                  | 6.57            | 1.51E-06 |
| 23     | 10632     | regulation of epithelial cell migration                       | 6.33            | 5.30E-03 |
| 24     | 43123     | positive regulation of I-kappaB kinase/NF-kappaB signaling    | 6.32            | 1.83E-03 |
| 25     | 7179      | transforming growth factor beta receptor signaling pathway    | 6.31            | 4.74E-02 |

Supplemental figure S1: Relative CILP1 expression levels in patients receiving coronary artery bypass graft (CABG, n=6), or with aortic stenosis (AoS, subdivided in patients with ejection fraction, EF > 55% (n=6) and patients with EF < 55% (n=5)). Individual data points with means are presented.

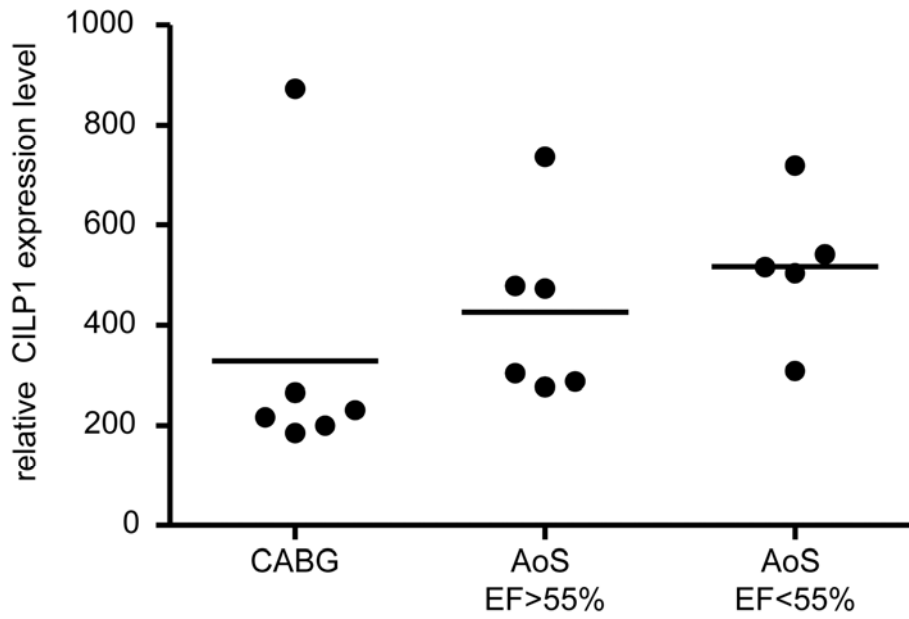

Supplemental figure S2: Relative cardiac left ventricular expression level of CILP1, CTGF, Col1a1, TGF $\beta$ 1 and TGF $\beta$ 3 in control animals (C, n=9) and in animals after 4 weeks of AngII infusion (n=9). Data are expressed as mean  $\pm$  SEM. \* p<0.05; \*\*\*p<0.001

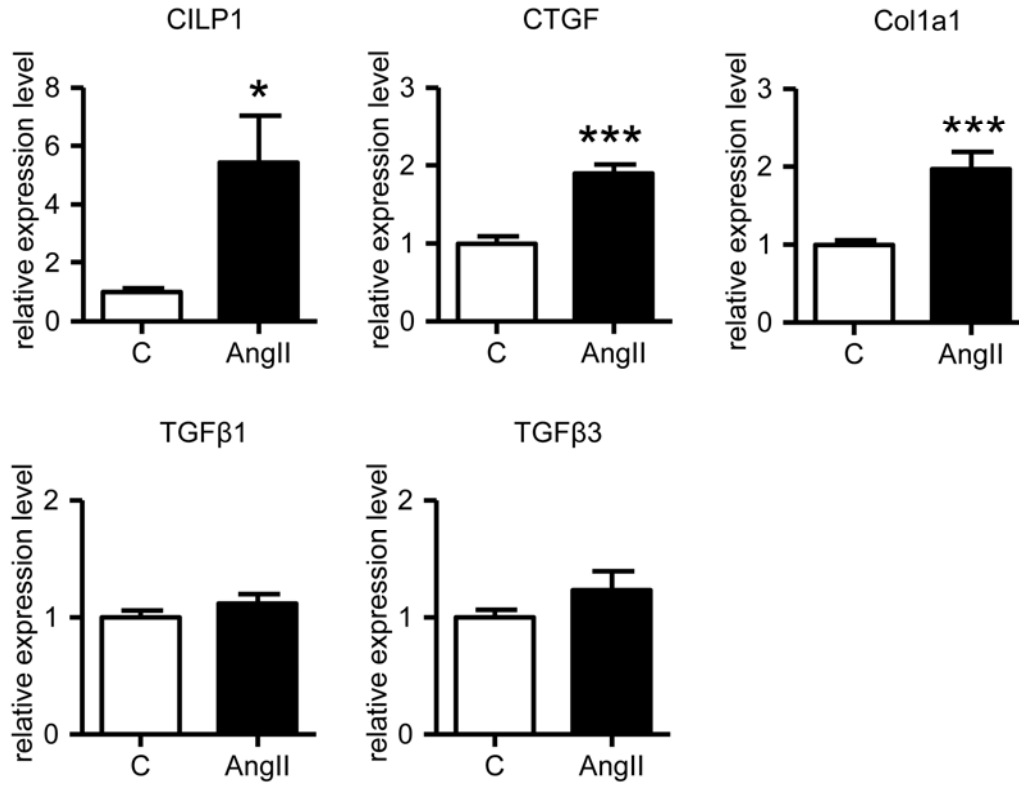

Supplemental figure S3: Relative cardiac left ventricular expression level of CILP1, CTGF, Col1a1 and TGF $\beta$ 1 in control animals (C, n=5) and in animals at 4 weeks after transverse aortic constriction (TAC, n=6). Data are expressed as mean  $\pm$  SEM. \* p<0.05

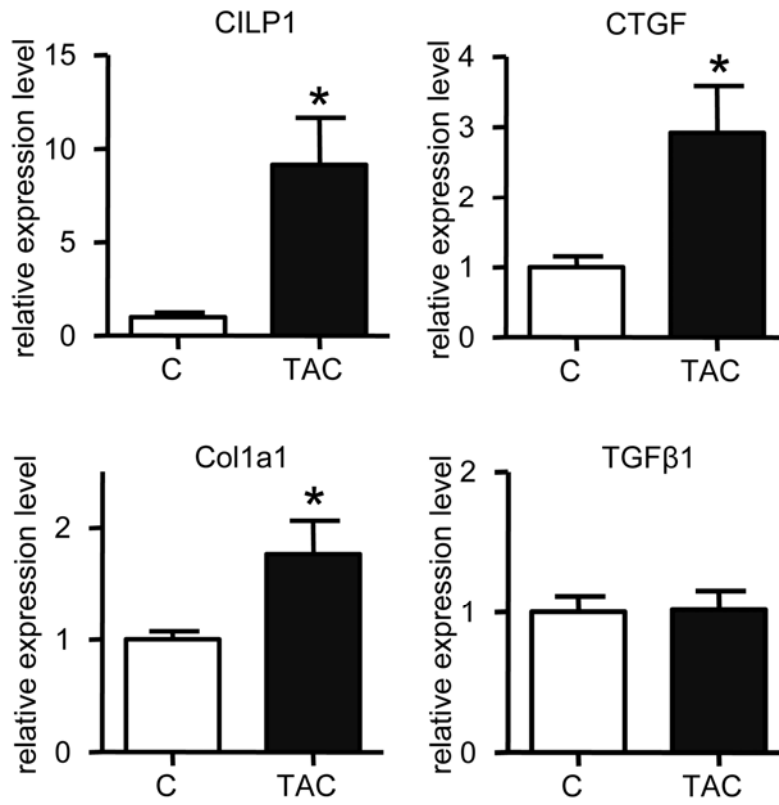

Supplemental figure S4: Effect of TGF $\beta$ 1, IL-1 and IGF-1 incubation for 24 h on gene expression levels of CILP1 and ACTA2 in primary adult rat ventricular fibroblasts. Data are from 5 separate isolations and are expressed as mean  $\pm$  SEM. \*  $p < 0.05$ ; \*\*\* $p < 0.001$

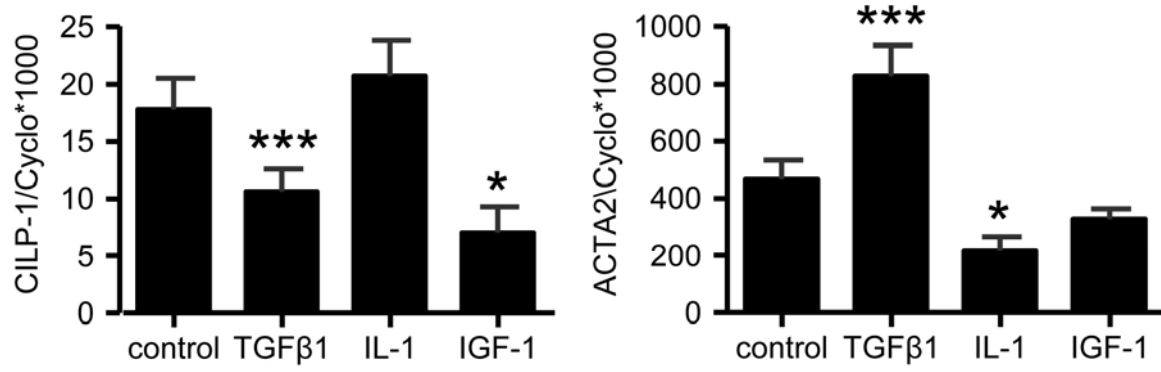



Supplemental figure S5: Detection of CILP protein in conditioned media from transfected HEK293 cells by Western blot analysis.

Lane 1, recombinant human CILP1 (10 ng)

Lane 2, human cartilage 3  $\mu$ g

Lane 3, Conditioned medium from HEK293 cells transfected with CILP expression vector

Lane 4, Concentrated conditioned medium from HEK293 cells transfected with CILP expression vector.

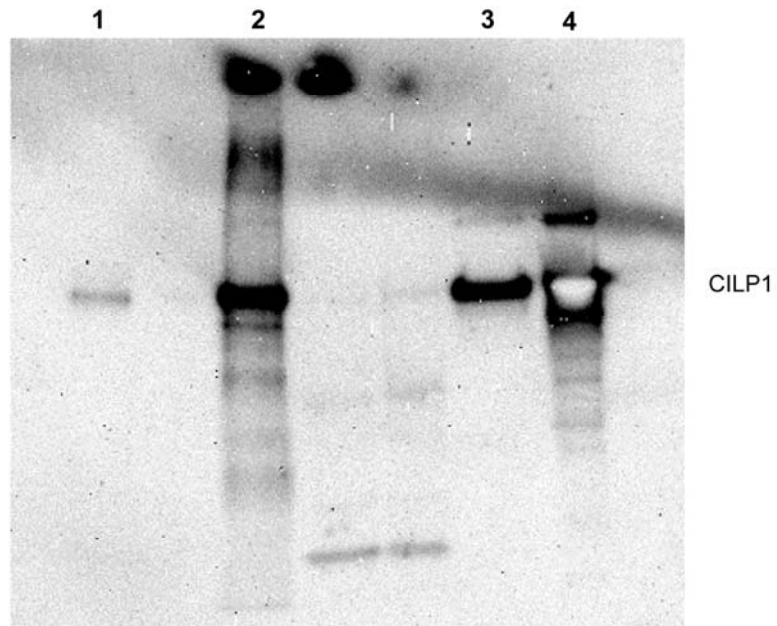

Supplemental figure S6: Full-length western blot shown in Figure 1A CILP expression in human myocardial infarct tissue. CILP1 protein was detected in human myocardial tissue by Western blot analysis.

Lane 1, human cartilage 5  $\mu$ g

Lane 2, human cartilage 2.5  $\mu$ g

Lane 3, empty

Lane 4, human cardiac left ventricular tissue

Lane 5, human infarct tissue

Lane 6, human infarct tissue

Lane 7, human infarct tissue

Lane 8, human infarct tissue

Note that the tissue samples from lane 4 and 5 were obtained from the same human subject.

### Antibody CILP1 - 600 s with dura substrate

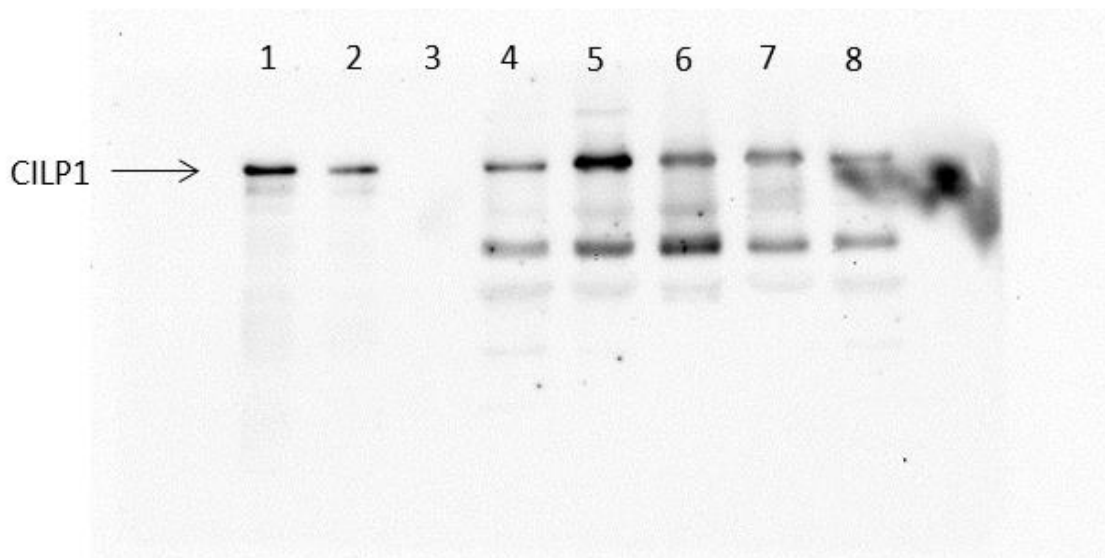

Supplemental figure S7: Full-length western blot shown in Figure 1B

Western blot of endomyocardial biopsies from patients with aortic valve stenosis and control subjects.

Lane 1, Control subject spiked with 1 ng recombinant CILP1

Lanes 2-7 Aortic valve stenosis (AS) patients

Lanes 8-10, control subjects.

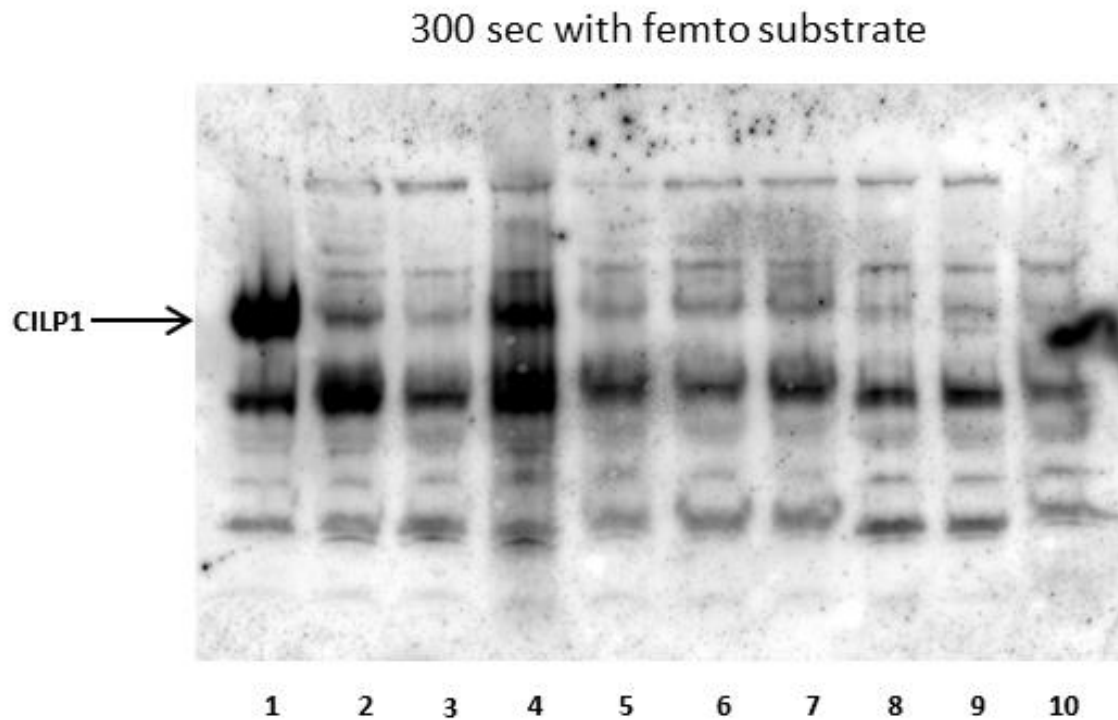

Supplement: 41598_2017_16201_MOESM1_ESM.pdf [file 41598_2017_16201_MOESM1_ESM.pdf]
